# Supplementary material for: VEIN v0.2.2: an R package for bottom-up Vehicular Emissions Inventories
Source: Copernicus journal article supplement (doi:10.5194/gmd-2017-193), 2017-09-25
Supplement: Supplementary file [file vein.pdf › paper_rc1/vein.pdf]

# VEIN v0.2.2: an R package for bottom-up Vehicular Emissions Inventories

Sergio Ibarra-Espinosa<sup>1</sup>, Rita Ynoue<sup>1</sup>, Shane O’Sullivan<sup>2</sup>, Edzer Pebesma<sup>3</sup>, Maria de Fátima Andrade<sup>1</sup>, and Mauricio Osses<sup>4</sup>

<sup>1</sup>Department of Atmospheric Sciences, Universidade de São Paulo, Rua do Matão 1226, São Paulo, SP, Brazil

<sup>2</sup>Department of Pathology, Faculdade de Medicina, Universidade de São Paulo, Av. Dr. Arnaldo 455, São Paulo, SP, Brazil

<sup>3</sup>Institute for Geoinformatics, Westfälische Wilhelms-Universität Münster, Heisenbergstraße 2, 48149 Münster, Germany

<sup>4</sup>Department of Mechanical Engineering, Universidad Técnica Federico Santa María, Vicuña Mackenna 3939, Santiago, Chile

*Correspondence to:* Sergio Ibarra-Espinosa (zergioibarra@gmail.com)

## Abstract.

Emission inventories are the quantification of pollutants from different sources. They provide important information not only for climate and weather studies, but also for urban planning and environmental health protection. We developed an open source model (named VEIN v0.2.2) that provides high resolution vehicular emissions inventories for different fields of studies. We focused on vehicular sources at street and hourly levels due to the current lack of information about these sources, mainly in developing countries. The type of emissions covered by VEIN are: exhaust (hot and cold) and evaporative considering the deterioration of the factors. VEIN also performs speciation and incorporates functions to generate and spatially allocate emissions databases. It allows users to load their own emissions factors, but it also provides emissions factors from the road transport model (Copert), the United States Environmental Protection Agency (EPA) and Brazilian databases. The VEIN model reads, distributes by age of use and extrapolates hourly traffic data, and estimates hourly and spatially emissions. Based on our knowledge, VEIN is the first bottom-up vehicle emissions software that allows input to the WRF-Chem model. Therefore, the VEIN model provides an important, easy and fast way of elaborating or analyzing vehicular emissions inventories, under different scenarios. The VEIN results can be used as an input for atmospheric models, health studies, air quality standardizations and decision making.

## 1 Introduction

Emissions inventory is a quantification of pollutants discharged into the atmosphere by different sources (Pulles and Heslinga, 2010). This quantification is vital for regulatory and scientific purposes, because it allows to monitor the state of the Earth’s atmosphere and climate. It also allows to create air quality standards, which will protect ecosystems and human health. For instance, the Intergovernmental Panel on Climate Change (IPCC) includes a dedicated task force, separated from the other three working groups, only for the purpose of greenhouse gas emissions inventory issues (Paustian et al., 2006).

In this instance, there are several emissions inventories that use different input data and approaches for different scales. One of the most frequently used inventories is the Emission Database for Global Atmospheric Research (EDGAR; Olivier

et al. 1996), which provides estimates for the total emissions worldwide. This inventory uses national statistics that do not provide detailed characterizations of high resolution applications. These detailed characterizations are needed for urban studies. There are also continental emissions inventories such as the European Monitoring and Evaluation Programme (EMEP), which compile emissions from the parties of the Convention on Long-range and Transboundary Air Pollution (CLRTAP) (EEA, 2013).

5 Moreover, there is the Regional Emissions inventory in Asia (REAS), which covers China, Japan and other countries (Streets et al., 2003). (1) Also, there are nationwide inventories such as the National Emissions Inventory (NEI) in United States, which is released every three years, based on data from State, local and tribal agencies and compiled by the Environmental Protection Agency (US-EPA). However, there are many countries and cities that do not include estimates of emissions for environmental and climate planning.

10 Vehicular emissions are becoming increasingly important in urban centers (Andrade et al., 2017) and measurements have shown that compounds emitted from exhausts can be highly reactive in the atmosphere, contributing to critical episodes of photochemical smog (Nogueira et al., 2015). However, obtaining this type of emissions database can be complicated, since the sources are in movement and the emissions process is complex with many variables. This can be a challenge, especially in developing countries due to the lack of information about the vehicle type, technology, age, motor size, fuel, speeds, accelera-  
15 tions, street type, environmental temperature and humidity, among other aspects. Besides that, there are other aspects involving the emissions inventory. The most common aspects are the accuracy and complexity relating to the exact contribution of the different pollutant sources, and that in most cases, emissions inventories are usually seen as a scapegoat when simulations do not match observation (Pulles and Heslinga, 2010).

Vehicular emissions inventories are classified according to top-down and bottom-up approaches. Top-down are based on statistics of vehicle composition, representative speeds and country balances, while bottom-up are based on traffic counts, vehicle composition and speed recording (Ntziachristos and Samaras, 2016). (3) An example of bottom-up emissions model is the SPARE-Truck (Spatial Regression and Output Optimization Truck) (Perugu et al., 2017), which produces truck activity data at link-street level and then estimate emissions using the US-EPA MOVES (Koupal et al., 2003). The accuracy of the emissions inventory will reflect on the representation of the pollutants in the atmosphere. It is not always related to the complexity of the  
25 model. For instance, a meta-analysis of several studies on vehicular emissions (Smit et al., 2010) concluded that there is no evidence that the more complex models perform better than the less complex ones, and that emissions estimation technique must be chose according the available traffic data. An emissions inventory must be comprehensive, including all the important sources and aspects regarding the emissions.

These complexities were addressed by the Department of Atmospheric Sciences at the University of São Paulo (USP) when  
30 modeling the atmospheric chemistry over Brazilian cities using a top-down vehicular emissions inventory with an on-line atmospheric model (Andrade et al., 2015). The Metropolitan Area of São Paulo (MASP), is the most populated megacity in Latin America (IBGE, 2014) and its most important source of pollution comes from the 11 million vehicles that circulate within the Region (CETESB, 2013; DENATRAN, 2015; Andrade et al., 2017). Furthermore, half of all emissions of CO, HC and NO<sub>x</sub> in the MASP are from vehicles that are more than 10 years old (Andrade et al., 2017). (2) Despite that the inventories developed by Andrade et al. (2015) are useful, they still suffer top-down limitations using surrogates to produce spatial and

temporal distributions, hence limiting the representation of the emissions. Therefore, we decided to develop our own bottom-up vehicular emissions inventory model. With this model, we aim to generate scientific estimates and provide useful information to decision-makers and urban/environmental planners.

The main goal of this project was to develop a high spatial and temporal resolution vehicular emissions inventory model, which was named as the Vehicular Emissions Inventory VEIN model. The VEIN model follows the bottom-up approach. It allows the classification of vehicles into several categories, different options of emission factors and specification of pollutants, and input traffic from traffic simulations or other network-based sources. It is capable of producing gridded emissions outputs. It is open source, friendly for the user, and is available to run in any computational platform (Mac, Windows, Linux, etc).

## 2 VEIN model: methodology to estimate vehicular emissions

Temporal and spatial disaggregated emissions are estimated following a general approach of multiplication between activities and emission factors (Pulles and Heslinga, 2010), as shown in Eq. (1).

$$Emission_{pollutant} = \sum_{activity} (AR_{activity} \cdot EF_{pollutant,activity}) \quad (1)$$

where  $Emission_{pollutant}$  for any type of pollutant depends on the activity rate  $AR$  and the emission factors  $EF$ , which is the mass of pollutants generated according to the level of activity. In the context of vehicular emissions,  $AR_{activity}$  represents the number of vehicles times the distance (km) that they travel.  $EF_{pollutant,activity}$  is the emission factor ( $g \cdot km^{-1}$ ) for pollutants of the vehicles.

For a bottom-up estimation of vehicular emissions, a large number of parameters should be involved with the activity (traffic flow, vehicle composition, speed recording, length of road) and emission factors (speed or acceleration dependent) (Ntziachristos and Samaras, 2016). In this instance, the following sections provide the theory behind the VEIN model regarding traffic data arrangement, selection of emission factors, emissions estimation, spatial allocation and inputs for atmospheric models.

### 2.1 Traffic data

Traffic data required for the VEIN model must be represented as an hourly amount of vehicles per street.

This traffic data can be provided by traffic simulations, interpolations or by other sources. In the first step, VEIN reads spatial morning rush hour traffic data from each street of a desired area or city. After reading it, VEIN arranges and organizes the data by vehicle composition, according to Eq. (2).

$$F_{i,j,k}^* = Q_i \cdot VC_{i,j} \cdot Age_{j,k} \quad (2)$$

where  $F_{i,j,k}^*$  is the vehicular flow at street link  $i$  for vehicle type  $j$  by age of use  $k$ .  $j$  defines the vehicular composition according to their type of use, type of fuel, size of engine and gross weight, based on definitions of Corvalán et al. (2002).  $Q_i$  is the traffic flow at street link  $i$ .  $VC_{i,j}$  is the fraction of vehicles varying according to the type of vehicles  $j$  in the composition for street

link  $i$ .  $Age_{j,k}$  is the age distribution by vehicular composition  $j$  and age of use  $k$ . This Equation shows that  $VC$  splits the total vehicular flow  $Q$  to identify the vehicular fraction, which varies according to the type of fuel, size of motor and gross weight.

- 5 For example, if  $Q$  is light duty vehicles (LDV) and we know that 5% of the  $Q$  are passenger cars (PC), with engine lesser than 1400 cc,  $VC$  is 0.05. This characterization of the fleet depends on the amount and quality of the available information. VEIN then multiplies the traffic with  $Age$  to obtain the amount of each type of vehicle by age of use.

Traffic data must be temporally extrapolated because it is usually available for morning rush hour. Traffic data can be estimated from short period traffic count datasets, then expanded to represent longer timespan, such as Annual Average Daily

- 10 Traffic (AADT; Wang and Kockelman 2009; Lam and Xu 2000). The next step is to extrapolate the vehicular flow at street link  $i$ , vehicle type  $j$ , and age of use  $k$ , to obtain the vehicular flow for hour of the week  $l$  ( $F_{i,j,k,l}$ ; see Eq. 3).

$$F_{i,j,k,l} = F_{i,j,k}^* \cdot TF_{j,l} \quad (3)$$

(5) where  $F_{i,j,k,l}$  is the traffic flow for each link  $i$  and type of vehicle  $j$  of the vehicular composition, with the age of use  $k$  for the hour  $l$ .  $TF_{j,l}$  are the temporal factors varying according to each hour of  $l$  and type of vehicle  $j$ . For instance,  $TF$  is

- 15 defined as a matrix with 24 lines and numbers of columns to each day considered, from Monday to Sunday. In order to expand traffic to other hours,  $TF$  matrices must be normalized to the hour that represents the traffic data. It means that  $TF$  values at morning peak hour must be 1 and the respective proportion must be assigned to the other hours.  $TF$  values can be obtained from automatic traffic count stations or other hourly traffic data to obtain the temporal profile.

The average speed of traffic flow is very important and it must be determined for each link and hour. Once the vehicular flow is identified for each hour, the average speed is then identified for each hour. This was accomplished by employing curves from the Bureau of Public Roads (BPR; Bureau of Public Roads 1964), as shown in Eq. (4). The process involves calculating speed by dividing the length of road by the time. The time is calculated using the total traffic expanded to each street link  $i$  and hour  $l$ .

$$T_{i,l} = T_{o_i} \cdot \left( 1 + \alpha \cdot \left( \frac{Q_{i,l}}{C_i} \right)^\beta \right) \quad (4)$$

- 25 In Eq. 4,  $T_i$  is the travel time per street link  $i$  at each hour of the week  $l$ .  $T_{o_i}$  is the travel time under free flow conditions where maximum speed was used.  $Q_{i,l}$  is the traffic flow at peak hour for each street link  $i$  and hour of the week  $l$ .  $C_i$  is the capacity of vehicles on street link  $i$ . The parameters  $\alpha$  and  $\beta$  are adjustments with default values of 0.15 and 4, respectively Bureau of Public Roads (1964). (6) Nevertheless, inside the VEIN model, the user can use other values. With this information it is possible to calculate the time to travel during the link  $i$  at any hour  $l$ , and therefore, with the the length of the road, to
- 30 obtain the speed. (6) However, the information of the capacity is not always available. When there is at least the information of the peak and free flow speeds, it is possible to apply a simple average between both speeds to obtain the average speeds and then distribute these speeds at different hours.

## 2.2 Selection of the emissions factors

The emissions factors describe the relationship intensity of activity and emissions for a given technology (Pulles and Heslinga, 2010). In the case of our model, an emission factor is the mass of pollutant emitted by the vehicular type, technology and years of use. VEIN counts with emission factors for hot and cold exhaust, evaporative, deterioration and wear emissions. VEIN allows three types of hot exhaust emission factors:

- 1) Speed functions from the Computer programme to calculate emissions from road transport (Copert; Ntziachristos and Samaras 2016), which are stored internally in the model. This approach can be used if there is no local emission factors and if there is information about vehicular speed recordings, simulations, or knowledge of the representative speeds.
- 2) Emission factors from local sources. The values must be mass per km  $g \cdot km^{-1}$  per specific type of vehicle, including fuel type, size and weight, by age of use.
- 3) Scaled local emission factors with Copert in order to incorporate speed variation for local factors, as shown in Eq. (5). This produces a specific speed dependent on emission factor by age of use for the vehicle.

(7) Copert emission factors are based on emissions measurement made in Europe. This means that there is an inherent fuel composition associated with these factors. When the user want to use these factors, they must be corrected with the local fuel properties as shown by Ntziachristos and Samaras (2016). However, if the user uses emission factors based on local measurements, this correction is not necessary.

$$EF_{scaled}(V_{i,l})_{j,k,m} = EF(V_{i,l})_{j,k,m} \cdot \frac{EF_{local_{j,k,m}}}{EF(Vdc_{i,l})_{j,k,m}} \quad (5)$$

where  $EF_{scaled}(V_{i,l})_{j,k,m}$  is the scaled emission factor and  $EF(V_{i,l})_{j,k,m}$  is the Copert emission factor for each street link  $i$ , vehicle from composition  $k$ , hour  $l$  and pollutant  $m$ .  $EF_{local_{j,k,m}}$  represents the constant emission factor (not speed functions).  $EF(Vdc_{i,l})_{j,k,m}$  are Copert emission factors with average speed value of the respective driving cycle for the vehicular category  $j$ . The São Paulo emission factors data includes recordings of Federal Test Procedure (FTP-75) driving cycle for LDV with an average speed of  $34.12 \text{ km} \cdot \text{h}^{-1}$ , as shown in the report of driving cycles (Barlow et al., 2009).

By default, VEIN includes deterioration factors from Copert (Ntziachristos and Samaras, 2016). However, it is possible to include other sources, such as from Corvalán and Vargas (2003).

## 2.3 Emissions estimation

VEIN estimates type of emissions including hot exhaust (EH; Eq. 6), cold start exhaust (EC; Eq. 7), evaporative (EV; Eq. 8), deterioration factors and speciation. The total vehicular emission is the sum of all types of emissions.

### Hot exhaust emission

The VEIN process of emissions estimation is performed per street link, vehicle type, hour of week, and pollutant. Eq. (6) shows the hot exhaust estimation:

$$EH_{i,j,k,l,m} = F_{i,j,k,l} \cdot L_i \cdot EF(V_{i,l})_{j,k,m} \cdot DF_{j,k} \quad (6)$$

- 5 In Eq. (6),  $EH_{i,j,k,l,m}$  is the emissions for each street link  $i$ , vehicle category from composition  $k$ , hour  $l$  and pollutant  $m$ , where  $F_{i,j,k,l}$  is the vehicular flow calculated in Eq. 1.  $L_i$  is the length of the street link  $i$ .  $EF(V_{i,l})_{j,k,m}$  is the emission factor of each pollutant  $m$ .  $DF_{j,k}$  is the deterioration factor for vehicle of type  $j$  and age of use  $k$ . (4 and 8) Deterioration factors are emission degradation functions of gasoline vehicles using catalysts due to accumulated mileage based on European measurements (Ntziachristos and Samaras, 2016). Nevertheless, the user could use its own set of deterioration factors such as the proposed by Corvalán et al. (2002).

### Cold start emissions

- Cold start emissions are produced during engine startup, when the engine and/or catalytic converter system has not reached its normal operational temperature. (9) Consequently, these emissions occur when vehicle start the journey on parking locations or mostly in residential streets. Several studies have shown the significant impact for these types of emissions (Chen et al., 2011) (Weilenmann et al., 2009). VEIN also considers cold start emissions - under this condition emissions will be higher, and if the atmospheric temperature decreases, cold start emissions will increase regardless of whether the catalyst has reached its optimum temperature for functioning (Boulter, 1997). For example, studies report that when ambient temperature is  $-7^{\circ}\text{C}$ , emissions are one order of magnitude higher than at  $22^{\circ}\text{C}$  (Ludykar et al., 1999).
- 20 The VEIN model caters to these emissions by using the approach outlined in Copert (Ntziachristos and Samaras, 2016), as shown in Eq. (7).

$$EC_{i,j,k,l,m} = \beta_j \cdot F_{i,j,k,l} \cdot L_i \cdot EF(V_{i,l})_{j,k,m} \cdot DF_{j,k} \cdot (EF_{\text{cold}}(ta_n, V_{i,l})_{j,k,m} - 1) \quad (7)$$

- This approach adds two terms to Eq. 6. The first term  $EF_{\text{cold}}(ta_n, V_{i,l})_{j,k,m} - 1$  is the emission factors for cold start conditions at each street link  $i$ , vehicle category from composition  $k$ , hour  $l$  and pollutant  $m$  and monthly average temperature  $n$ . Ntziachristos and Samaras (2016) suggest using monthly average temperature. (9) As the information about the parking location is limited or in the Eq. (7) we are proposing the assignation of the emissions into the links. In the case of better information available, these emissions should be assigned into parking locations. These are important aspect that will be reviewed in future versions of VEIN.

- The second term  $\beta_j$  is defined as the fraction of mileage driven with a cold engine/catalyst (Ntziachristos and Samaras, 2016). The VEIN model incorporates a dataset of cold starts recorded during the implementation of the International Vehicle Emissions (IVE) model (Davis et al., 2005) in São Paulo (Lents et al., 2004), which provides the hourly mileage driven with cold start conditions.

### Evaporative emissions

Evaporative emissions are important sources of hydrocarbons and these emissions are produced by vaporization of fuel due to variations in ambient temperatures (Mellios and Ntziachristos, 2016; Andrade et al., 2017). There are mainly three types of evaporative emissions: diurnal emissions, due to increases in atmospheric temperature, which lead to thermal expansion of vapor fuel inside the tank; running losses, when the fuel evaporates inside the tank due to normal operation of the vehicle; and hot soak emissions, which occur when the hot engine is turned off. These methods implemented in VEIN were sourced from the evaporative emissions methods of Copert (Mellios and Ntziachristos, 2016). This approach is shown in Eqs. (8), (9) and (10).

$$EV_{j,k} = \sum_s D_s \cdot \sum_j F_j \cdot (HS_{j,k} + de_{j,k} + RL_{j,k}) \quad (8)$$

- where  $EV_j$  are the volatile organic compounds (VOC) evaporative emissions due to each type of vehicle  $j$ .  $D_s$  is the "seasonal days" or number of days when the mean monthly temperature is within a determined range:  $[-5^\circ, 10^\circ\text{C}]$ ,  $[0^\circ, 15^\circ\text{C}]$ ,  $[10^\circ, 25^\circ\text{C}]$  and  $[20^\circ, 35^\circ\text{C}]$ .  $F_{j,k}$  is the number of vehicles according to the same type  $j$  and age of use  $k$ .  $HS_{j,k}$ ,  $de_{j,k}$  and  $RL_{j,k}$  are average hot/warm soak, diurnal and running losses evaporative emissions ( $\text{g} \cdot \text{day}^{-1}$ ), respectively, according to the vehicle type  $j$  and age of use  $k$ .  $HS_{j,k}$  and  $RL_{j,k}$  are obtained using equations also sourced from :

$$HS_{j,k} = x_{j,k} \cdot (c \cdot (p \cdot e_{shc} + (1 - p) \cdot e_{swc}) + (1 - c) \cdot e_{shfi}) \quad (9)$$

- where  $x$  are the number of trips per day for the vehicular type  $j$  and age of use  $k$ .  $c$  is the fraction of vehicles with fuel return systems.  $p$  is the fraction of trips finished with hot engine, for example, an engine that has reached its normal operating temperature and the catalyst has reached its light-off temperature (Ntziachristos and Samaras, 2016). The light-off temperature is the temperature at the point when catalytic reactions occur inside a catalytic converter.  $e_{shc}$  and  $e_{swc}$  are average hot-soak and warm-soak emission factors for gasoline vehicles with carburettor or fuel return systems ( $\text{g} \cdot \text{parking}^{-1}$ ).  $e_{shfi}$  is the average hot-soak emission factors for gasoline vehicles equipped with fuel injection and non-return fuel systems ( $\text{g} \cdot \text{parking}^{-1}$ ).

$$RL_{j,k} = x_{j,k} \cdot (c \cdot (p \cdot e_{rhc} + (1 - p) \cdot e_{rwc}) + (1 - c) \cdot e_{rhfi}) \quad (10)$$

- $x$  and  $p$  have the same meanings of Eq. 9.  $e_{rhc}$  and  $e_{rwc}$  are average hot and warm running losses emission factors for gasoline vehicles with carburettor or fuel return systems ( $\text{g} \cdot \text{trip}^{-1}$ ) and  $e_{rhfi}$  are average hot running losses emission factors for gasoline vehicles equipped with fuel injection and non-return fuel systems ( $\text{g} \cdot \text{trip}^{-1}$ ). It is recommended to estimate the number of trips per day (Mellios and Ntziachristos, 2016),  $x$ , as the division between the mileage and 365 times the length of trip:  $x = \frac{\text{mileage}_j}{(365 \cdot l_{trip})}$ . However, the mileage of a vehicle is not constant throughout the years. Therefore, VEIN incorporates a dataset of equations to estimate mileage of different types of vehicles by age of use (Bruni and Bales, 2013). (10) and (11) The methods presented in this part corresponds to the Evaporative emission factors Tier 2 Mellios and Ntziachristos (2016). However, we expect to add Tier 3 methods in future versions of VEIN including hourly distribution parking patterns. Alternatively, the user could transform the units to produce emission factors in  $\text{g} \cdot \text{km}$  for convenience. For instance, in Eq. (9) and (10)  $x$  is the number of trips per day; knowing the mean distance per trip would allow to have  $x$  as the distance traveled per day.

## 2.4 Speciation of emissions in chemical sub-components

5 Particulate matter and hydrocarbons are a mixture of several chemical compounds that play an important role in atmospheric chemistry (Seinfeld and Pandis, 2016). VEIN includes speciation profiles for hydrocarbons and particulate matter from Ntziachristos and Samaras (2016) and Rafee (2015). These profiles are percentages of the emissions by vehicle type, fuel, emission standard and other characteristics. Also included are speciations of particulate matter in black carbon and organic matter, particulate matter fractions for tire, brake and road wear, non-methanic hydrocarbons and nitrogen oxides.

## 10 2.5 Spatial allocation and data-bases

VEIN provides functions to generate grids and spatially allocate emissions into grids. This is helpful for visualization and generation of inputs for atmospheric models, and as a tool for urban planning. In addition, VEIN includes functions to produce a database of hourly emissions for vehicular composition by age of use. Section 4.4 provides details and examples about the emissions grids and databases.

## 15 3 VEIN model design

The VEIN model was constructed using the free open source R software (R Core Team, 2017). R is a programming language and environment for statistical computing and graphics (R Core Team, 2017). It was developed primarily for analyzing data. However, since its capabilities have grown over time, R has become a flexible language with many different areas of application. It includes elements of programming language such as Lisp and syntax of S, as described by Leiner et al. (1997).

20 The VEIN R package depends on the package **sp** (Bivand et al., 2013), as it uses several of its classes. VEIN imports some functions from the package **rgeos** (Bivand and Rundel, 2016), which is an interface for the Geometry Open Source (GEOS) library (<https://trac.osgeo.org/geos/>). It also imports functions from **rgdal** (Bivand et al., 2016), which provides bindings to the Geospatial Data Abstraction Library (GDAL; <http://www.gdal.org/>). Therefore, these R packages must be installed prior to using the VEIN package.

25 VEIN started between 2014 and 2016 as a collection of several R scripts, initially named R-EMISSIONS (REMI; Ibarra-Espinosa and Ynoue 2017), which later evolved into an R package. It was developed in R due to the free open source advantages and because R allows easier reproducibility. VEIN is open to scrutiny from its community of users, thus allowing opportunities for user feedback and improvements. This facilitates widespread use of the model and identifying any software bugs/errors, with potential for adding new capabilities. VEIN has its own functions, but it also incorporates other data and functions such  
30 as emission factors and mileage.

VEIN can be installed from the Comprehensive R Archive Network (CRAN) <https://CRAN.R-project.org/package=vein> or from the website Github <https://github.com/ibarraespinosa/vein>. In order to use the VEIN library and run the demo, it is necessary to run the following scripts in R:

```
install.packages("vein") #or
```



```
library(devtools)
install_github("ibarraespinosa/vein")
```

```
5 library(vein)
demo(VEIN)
```

The diagram process for estimating emissions is shown in Fig. 1. The green circles in this Figure refer to the data and the blue boxes refer to the functions inside the model. The VEIN model diagram starts at the green circle traffic, which represents the morning rush hour traffic data for each street link. Then the *age* functions (*age\_ldv*, *age\_hdv*, *age\_ldv* or *my\_ldv*) determine the vehicular composition by age of use as shown in Eq. (2). The data *profile* allows to temporally extrapolate traffic data to the other hours and this allows to estimate the average vehicular speed to any hour and link using the function *netspeed*. Emission factor selections start by adding the deterioration effect with the function *emis\_det* into local, speed dependent emission factors from Ntziachristos and Samaras (2016), denoted as *speed\_ef* or scaled emission factors denoted as *scaled\_ef* in Fig. 1. Besides including speed dependent emission factors from Ntziachristos and Samaras (2016), VEIN also includes local emission factors from CETESB (2016). Once the input data is ready, the function *emis* estimates hourly emissions for each hour of the day, and day of the week. The function *emis\_post* produces an emissions database by vehicle category or by street, denoted as *df* and *street* in Fig. 1 respectively. These emissions are then speciated with the function *speciate*. At this time, the user can create a grid with the function *make\_grid*, which creates a rectangular grid with format *SpatialPolygonsDataFrame* or a *SpatialGridDataFrame* used to allocate emissions spatially with the function *emis\_grid*. The function *emis\_wrf* reads the emissions grids and creates a data-frame ready to create an input for WRF-Chem model (Grell et al., 2005). This data-frame must be exported as a .txt file and could be used as an input into other atmospheric models such as BRAMS (Freitas et al., 2005).

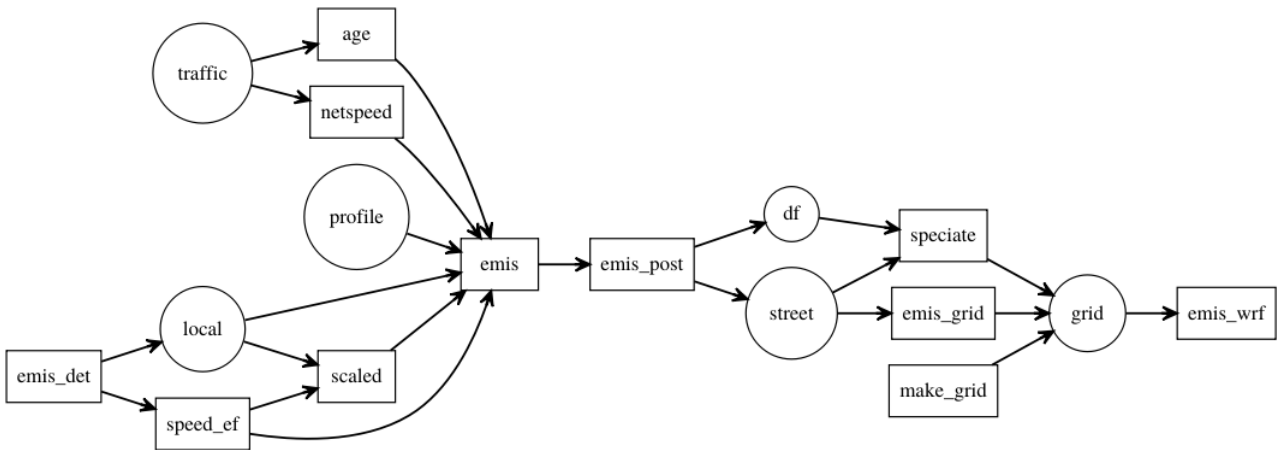

**Figure 1.** Representation of the VEIN model. Boxes and circles represent functions and data, respectively.

### 3.1 Functions and classes

VEIN uses objects of class **Spatial** (Pebesma and Bivand, 2005), including `SpatialLinesDataFrame`, to represent road segments. To read geospatial data, there are several packages,

such as **rgdal** (Bivand et al., 2016) or **maptools** (Bivand and Lewin-Koh, 2015). The main requirement is that the network must be a `SpatialLinesDataFrame`, class of **sp** (Pebesma and Bivand, 2005).

We included several functions to arrange traffic data, select or scale emission factors, as well as estimate and process emissions in VEIN, as shown in Table 1. These functions implement the equations shown in Section 2.

VEIN incorporates 8 classes (see Table 1), which are objects with specific characteristics: methods and units. The methods are print, summary and plot. They are functions that return a specific result depending on each class. Another important characteristic of each class is that they include explicit units, in an effort to reduce human errors and improve the usability. For this task, VEIN imports some functions of the package **units** (Pebesma et al., 2016), which is an interface in the C library **udunits** from University Corporation for Atmospheric Research (UCAR). Therefore, this library must be installed on the system prior to using VEIN. Only the `EmissionFactorsList` and `EmissionsArray` do not show their units explicitly due to limitations with the units package. The classes outlined in Table 1 are also constructor functions, which means that they can create VEIN classes and add the respective units. VEIN incorporate constructor functions to create classes such as `Vehicles` or `Emissions`. These functions are incorporated inside other VEIN functions in order that the output of VEIN has a class. When the constructor function are applied to a numeric element, the constructor simply adds the units and the resulting object has class **units**. For example, applying the function `EmissionsArray` to a numeric vector will add the units  $\text{g} \cdot \text{h}^{-1}$  to the numeric vector.

Table 1: Summary of the VEIN classes, functions and internal data.

| Function                      | Description                              | Reference                          |
|-------------------------------|------------------------------------------|------------------------------------|
| <code>age_hdv</code>          | Distribution of HDV by age of use        | Ministério do Meio Ambiente (2011) |
| <code>age_ldv</code>          | Distribution of LDV by age of use        | Ministério do Meio Ambiente (2011) |
| <code>age_moto</code>         | Distribution of Motorcycle by age of use | Ministério do Meio Ambiente (2011) |
| <code>ef_evap</code>          | Evaporative emission factors             | Mellios and Ntziachristos (2016)   |
| <code>ef_hdv_scaled</code>    | List of scaled emission factors for HDV  | Ntziachristos and Samaras (2016)   |
| <code>ef_hdv_speed</code>     | HDV Emission factors                     | Ntziachristos and Samaras (2016)   |
| <code>ef_ldv_cold</code>      | LDV cold start emission factors          | Ntziachristos and Samaras (2016)   |
| <code>ef_ldv_cold_list</code> | List of LDV cold start emission factors  | Ntziachristos and Samaras (2016)   |
| <code>ef_ldv_scaled</code>    | List of scaled emission factors for LDV  | Ntziachristos and Samaras (2016)   |
| <code>ef_ldv_speed</code>     | LDV Emission factors                     | Ntziachristos and Samaras (2016)   |
| <code>ef_wear</code>          | Tyre and break wear, and road abrasion   | Ntziachristos and Boulter (2009)   |

Table 1: Summary of the VEIN classes, functions and internal data.

| Function            | Description                                                                        | Reference                                         |
|---------------------|------------------------------------------------------------------------------------|---------------------------------------------------|
| EmissionFactors     | Creates class <code>EmissionFactors</code> ( $\text{g} \cdot \text{km}^{-1}$ )     |                                                   |
| EmissionFactorsList | Creates class <code>EmissionFactorsList</code> ( $\text{g} \cdot \text{km}^{-1}$ ) |                                                   |
| Emissions           | Creates class <code>Emissions</code> ( $\text{g} \cdot \text{h}^{-1}$ )            |                                                   |
| EmissionsArray      | Creates class <code>EmissionsArray</code> ( $\text{g} \cdot \text{h}^{-1}$ )       |                                                   |
| EmissionsList       | Creates class <code>EmissionsList</code> ( $\text{g} \cdot \text{h}^{-1}$ )        |                                                   |
| emis                | Estimation to hour and day of the week                                             |                                                   |
| emis_cold           | Cold start estimation                                                              | Ntziachristos and Samaras (2016)                  |
| emis_det            | Deterioration factors                                                              | Ntziachristos and Samaras (2016)                  |
| emis_evap           | Evaporative estimation                                                             | Mellios and Ntziachristos (2016)                  |
| emis_grid           | Allocation on rectangular grid                                                     |                                                   |
| emis_paved          | Re-suspension of paved roads                                                       | USA-EPA (2016)                                    |
| emis_post           | Post processing of emissions                                                       |                                                   |
| emis_wear           | Estimation of wear emissions                                                       | Ntziachristos and Boulter (2009)                  |
| emis_wrf            | Creating data-frame to WRF-Chem                                                    | Vara-Vela et al. (2016)                           |
| Evaporative         | Creates class <code>Evaporative</code> ( $\text{g} \cdot \text{d}^{-1}$ )          |                                                   |
| fe2015              | Data of CETESB emission factors                                                    | CETESB (2016)                                     |
| fkm                 | Data of mileage functions by vehicle                                               | Bruni and Bales (2013)                            |
| hot_soak            | Hot soak evaporative                                                               | Mellios and Ntziachristos (2016)                  |
| make_grid           | Rectangular grid                                                                   |                                                   |
| my_age              | Distribution of vehicles by age of use                                             |                                                   |
| net                 | Data of traffic simulation of west São Paulo                                       | CET (2014)                                        |
| netspeed            | Estimate average speed                                                             |                                                   |
| pc_profile          | Data of temporal factors                                                           | ARTESP (2012)                                     |
| pc_cold             | Data of vehicle start pattern                                                      | Lents et al. (2004)                               |
| running_losses      | Evaporative estimation                                                             | Mellios and Ntziachristos (2016)                  |
| speciate            | Split by species                                                                   | Ntziachristos and Samaras (2016),<br>Rafee (2015) |
| Speed               | Creates class <code>Speed</code> ( $\text{km} \cdot \text{h}^{-1}$ )               |                                                   |
| temp_fact           | Expand hourly traffic                                                              |                                                   |
| Vehicles            | Creates class <code>Vehicles</code> ( $\text{l} \cdot \text{h}^{-1}$ )             |                                                   |
| vkm                 | Determination of vehicle-kilometers                                                |                                                   |

## 5 4 Estimating MASP vehicular emissions using VEIN model

This section presents the application of the most important functions of the VEIN model. These functions obtain an estimate of CO emissions from LDV fleets in MASP for 2015 (for a typical non-holiday week).

### 4.1 Traffic data for MASP

Hourly traffic is a requirement for this data. This data can only be represented as one hour of data, which can then be extrapolated with the VEIN functions or as a list of hourly traffic data for all the covered hours. The present application includes a **4-stage travel demand model** for MASP CET (2014) for a morning rush hour loaded into R as a `SpatialLinesDataFrame`. It includes peak and free flow speeds, along with capacity (maximum amount of vehicles that can circulate in a road per hour) and traffic flow from LDV and HDV. Fig. (2) shows the traffic simulation of LDV at 08:00-09:00 local time (LT), where urban motorways concentrate the highest amount of vehicles. The total volume of LDV is  $24708767 \text{ veh} \cdot \text{h}^{-1}$  and the number of streets are 34733 with mean of  $711 \text{ veh} \cdot \text{h}^{-1} \cdot \text{street}^{-1}$ . It is important to note that the VEIN model provides an extraction of the traffic simulation for the western part of São Paulo. The traffic simulation for MASP has a size of 61.6 Mb and the extraction for the western part of São Paulo 3.1 Mb. We provided the extraction and not the whole traffic simulation in VEIN to make it faster. This section provides codes to run VEIN so that the reader can follow them with the data provided in the model.

After loading traffic data, the traffic flow was expanded to each hour of the week with the function `temp_fact`, as shown in the following scripts. It is also necessary to extrapolate hourly vehicle speeds. Therefore, we created the function `netspeed`, which applies the function BPR (Bureau of Public Roads, 1964) curves, according to the Eq. 4. To use BPR, a data-frame is required with total traffic at all hours and the morning rush parameters capacity, peak speed, free flow speed, length of the road, and with BPR parameters alpha and beta. The argument `scheme` produces a 24 hour speed data-frame, based only on peak and free flow speed with a profile of free flow speeds at early mornings, peak speeds, morning and evening rush hours, and the average at hours in between. If the time-lapse for the emissions estimation is longer than a week, the user could simply replicate the hours until it reaches the desired hours.

```
data(net)
15 data(pc_profile)
pcw <- temp_fact(net$ldv+net$hdv, pc_profile)
speedspeed <- netspeed(pcw, net$ps, net$ffs, net$capacity, net$lkm, alpha = 1)
```

For example purposes, the resulting speeds can be observed in Fig. 3, which shows two different speed maps: one for 08:00 LT (left panel) and the other for 23:00 LT (right panel). This Figure shows that the highest speeds are found in most of the streets further away from the MASP center at both times (08:00 and 23:00 LT). The major difference between the two panels (left and right), is that in the late night, the flow is faster near the center of MASP. This seems reasonable since the vehicular flow tends to diminish during the night. The average speeds also show a pattern related to the type of street as shows Fig. 4. The type of streets comes from São Paulo traffic simulation and they were translated to English and are defined as Motorway:

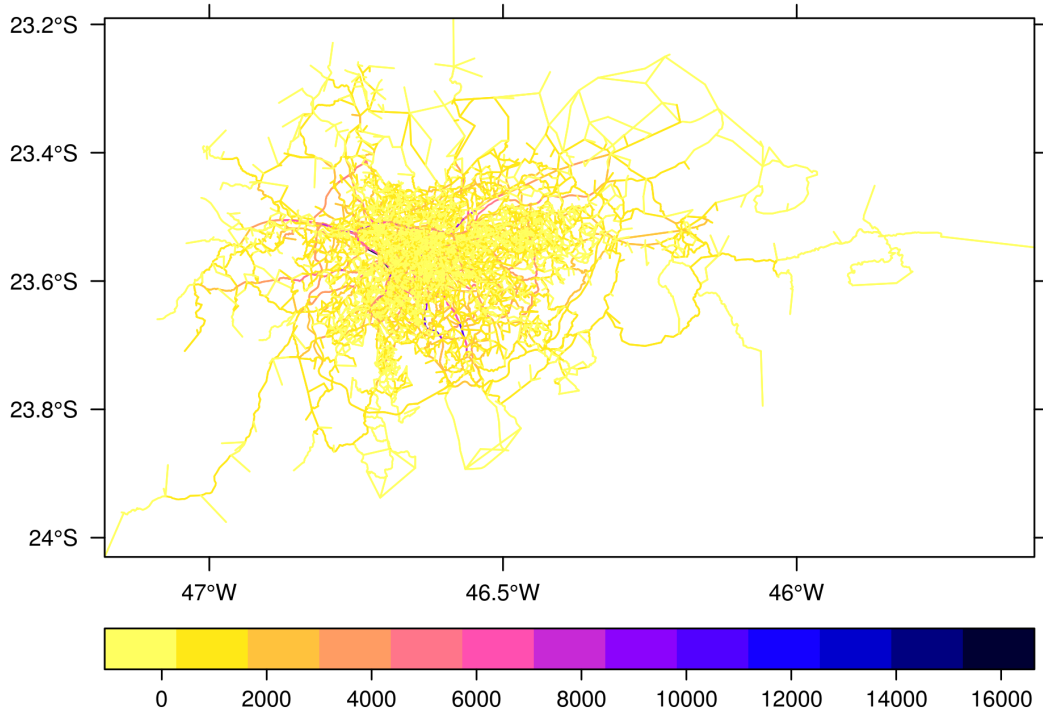

**Figure 2.** Traffic flow simulation for LDV ( $\text{veh} \cdot \text{h}^{-1}$ ) at 08:00-09:00 LT for MASP.

roads with speed limits above  $80 \text{ km} \cdot \text{h}^{-1}$  without physical intersections. Arterial: roads with speed limit of  $60 \text{ km} \cdot \text{h}^{-1}$  with intersection such as traffic lights. Collector: roads with speed limit of  $40 \text{ km} \cdot \text{h}^{-1}$  that collect and distribute traffic between Arterial streets. Local: roads with speed limit of  $30 \text{ km} \cdot \text{h}^{-1}$  that access restricted zones. Figure 4 shows that lower speeds are found during the morning (07:00-10:00 LT) and evening (17:00-20:00 LT) rush hours. This is important in terms of air pollution because at lower speeds vehicles emit more pollutants (Ntziachristos and Samaras, 2016). On the contrary, maximum average speeds for each type of road are obtained at night hours and on Sundays at all hours.

After calculating the São Paulo traffic flow average speeds for each hour of the week and each street link, the age distribution of the fleet was obtained by type of vehicle. The *age\** functions (*age\_ldv*, *age\_hdv* and *age\_moto*) distribute the traffic data by the vehicle's age of use. These functions return a data-frame with the number of rows matching the number of streets, columns representing the amount of vehicles by age of use, and a message indicating the average age of the fleet. The *age\** functions are related to the Eq. 2, where they split the vehicular flow at street link  $Q_i$  by type of vehicle  $j$  and the vehicle's age of use  $k$ . These functions are based on the survival equations presented in the Brazilian Emissions Inventory Report by the Ministério do Meio Ambiente (2011) and parameterized for the VEIN model. They allow the use of different coefficients to obtain different

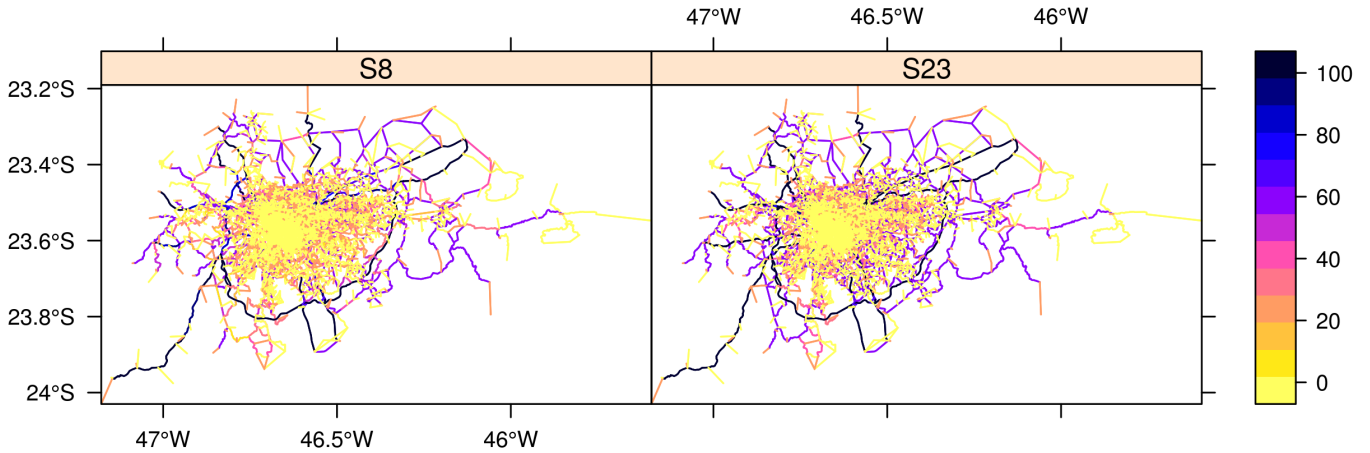

**Figure 3.** Traffic speeds (colored lines;  $\text{km} \cdot \text{h}^{-1}$ ) for LDV fleet at 08:00 LT (left panel) and 23:00 LT (right panel) in MASP.

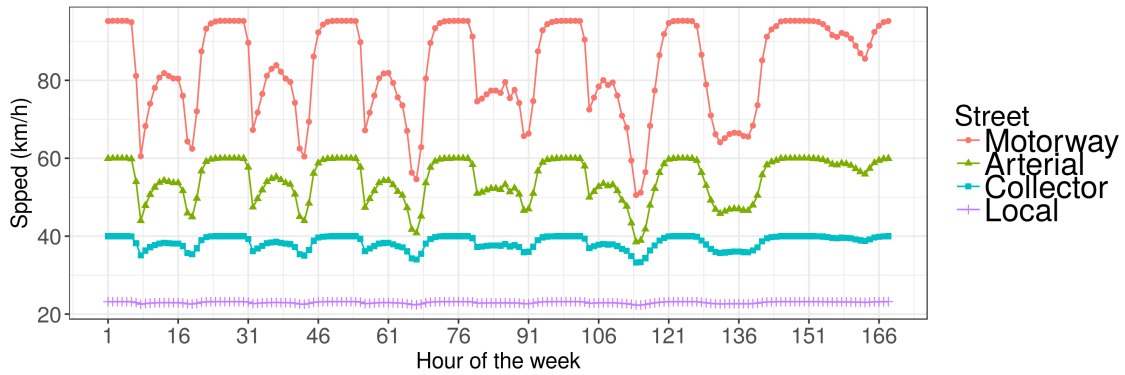

**Figure 4.** Traffic average speeds for LDV fleet by type of street (colored lines) at 08:00-09:00 LT in MASP.

age distributions allowing the representation of different realities. Furthermore, the function *my\_age* distributes the traffic from an existing dataset, e.g. yearly vehicle licensing.

The following code shows three uses of *age\** functions. The first, *my\_age*, uses yearly traffic data from the report of the São Paulo emissions inventory (CETESB, 2016), expressed as CETESB\_PC based on vehicle sales. The second, *age\_ldv*, uses default parameters, and the third, *age\_ldv*, uses  $b = -0.14$ .

```
CETESB_PC <- c(33491,22340,24818,31808,46458,28574,24856,28972,37818,49050,87923,
133833,138441,142682,171029,151048,115228,98664,126444,101027, 84771,55864,36306,
21079,20138,17439, 7854,2215,656,1262,476,512, 1181, 4991, 3711, 5653, 7039,5839,
4257,3824,3068)
pcl <- my_age(x = net$ldv, y = CETESB_PC, name = "PC")
```

```
pc2 <- age_ldv(x = net$ldv, name = "PC", agemax = 41)
5 pc3 <- age_ldv(x = net$ldv, name = "PC", b = - 0.14, agemax = 41)
```

Figure 5 (a) shows three age distributions, each one sums 24708767 veh · h<sup>-1</sup>, and each have different average age. It represents São Paulo LDV fleet according to its age of use, with an estimated average age of 11.09 years (red line), 15.53 years (blue line), and 15.17 years (green line). This Figure shows that in MASP there are more newer vehicles than older ones. *age\** functions also include a logical option named *bystreet*, with default value equal to FALSE. When this value is TRUE, *age\** expects that the coefficients *a* and *b* for the *age\** functions are numeric vectors, with length matching the number of streets. This allows different age distributions within the same road network and it is particularly useful for areas with less information about the vehicles' age of use.

## 4.2 Emission Factors

Once we obtain the traffic flow for the desired type of vehicles (in our LDV example), for each hour of the day, for all (desired) days of the week, for each age distribution and for each street link, then we can proceed to the emissions calculation by itself.

The VEIN package includes a database titled *fe2015* with emission factors for PC and light trucks by age of use from the São Paulo official vehicular emissions inventory (CETESB, 2016). This inventory was performed using a top-down approach and the pollutants estimated were CH<sub>4</sub>, CO, CO<sub>2</sub>, HC, N<sub>2</sub>O, NMHC, NO<sub>x</sub>, and PM. This data includes national and equivalent Euro Emission Standards by year and age. The equivalence among Brazilian CONAMA (1986), MMA (2011), MMA (2015) and Euro Directive70/220/EEC (1991) was added into this database in order to choose the corresponding matching vehicle and emissions standard. The equivalence can be seen in Table 2.

*fe2015* emission factors do not include the deterioration effect due to accumulated age of vehicle and it must be included. This is performed with the deterioration factor function *emis\_det* which has the arguments: pollutant, size of engine, Euro Standard and mileage in km. VEIN includes a Brazilian database of mileage functions named *fkm*, which is a list of functions with each element of the list corresponding to vehicle type. These functions depend on the vehicle's age of use and they originate from the odometer readings of more than  $1.6 \cdot 10^6$  vehicles (Bruni and Bales, 2013).

Emission factors for PC, LCV and motorcycles are called with the function *ef\_ldv\_speed*. In the case of trucks and buses they use the function *ef\_hdv\_speed*. The arguments are filters for an internal database of emission factors which include several parameters such as fuel, Euro Standard, volume of engine and load, among others. These functions also include a multiplication factor with a default value of 1. Exact spelling is required when using the arguments. If the argument names are entered incorrectly, VEIN will not return the emission factor functions.

The following code shows how to read the emission factors of the VEIN databases *fe2015*, *pc\_profile* and *fkm*, in order to incorporate the deterioration effect into the CETESB (2016) emission factors. The age of LDV shown in Fig. 5 (a) has a length of 41 years. This means that it needs 41 emission factors, one per each age of use. (14) We used a 41 years distribution because we want to have a realistic representation of the vehicles in circulation by age of use, despite that oldest vehicles have a small number. This allow us to obtain emissions by age of use of the vehicles, hence, VEIN can be used as a fast tool for scrapping

**Table 2.** Proposed equivalence of emission standards used in São Paulo study.

| Vehicle    | Brazilian Standard | Euro Standard | Year        |
|------------|--------------------|---------------|-------------|
| LDV        | L - 1              | Pre ECE       | 1988 - 1991 |
|            | L - 2              | Euro 1        | 1992 - 1996 |
|            | L - 3              | Euro 2        | 1997 - 2004 |
|            | L - 4              | Euro 3        | 2005 - 2011 |
|            | L - 5              | Euro 4        | 2012 - 2013 |
|            | L - 6              | Euro 5        | 2014        |
| HDV        | P - 1              | Pre Euro      | 1990 - 1992 |
|            | P - 2              | Pre Euro      | 1993        |
|            | P - 3              | Euro 1        | 1994 - 1997 |
|            | P - 4              | Euro 2        | 1998 - 2003 |
|            | P - 5              | Euro 3        | 2004 - 2011 |
|            | P - 6              | Euro 4        | -           |
|            | P - 7              | Euro 5        | 2012        |
| Motorcycle | M - 1              | Euro 1        | 2003 - 2005 |
|            | M - 2              | Euro 2        | 2006 - 2008 |
|            | M - 3              | Euro 3        | 2009        |

Based on <http://transportpolicy.net/index.php?title=Category:Brazil>

**policies and other applications.** It calls the function *emis\_det*, which requires the accumulated mileage, obtained from the list of mileage equations *fkm*. The Fig. 5(c) shows the emission factors from CETESB with and without deterioration by age of use. We are using deterioration factors from Ntziachristos and Samaras (2016) that affect only vehicles with a catalytic system. The base year of this emissions estimation is 2015 and the vehicles with catalytic system started in 1992 in Brazil (23 years before 2015). Therefore, the vehicles that entered into the market before 1992 do not include deterioration. The emission factors dataset *fe2015* includes emission factors for vehicles with only 36 years of use but the vehicular distribution calculated in the last script has 41 years of use. Therefore, we repeated the oldest emission factors to have 41 emission factors. Here we are assuming that the emission factors of vehicles 36 years of use it is the same as the vehicles till 41 years of use. The last line of the following script calculates the deteriorated emission factors of Passenger Cars by age of use.

```
data(fe2015)
data(pc_profile)
data(fkm)
pckm <- fkm[[1]](1:24)
pckma <- cumsum(pckm)
cod1 <- emis_det(po = "CO", cc = 1000, eu = "III", km = pckma[1:11])
cod2 <- emis_det(po = "CO", cc = 1000, eu = "I", km = pckma[12:24])
```



```

5 col <- fe2015[fe2015$Pollutant == "CO", ]
  col[37:41, ] <- col[36, ]
  cod <- c(col$PC_G[1:24] * c(cod1, cod2), col$PC_G[25:nrow(col)])

```

Once the deterioration effect was added into the Brazilian emission factors CETESB (2016), they were scaled to account for speed with the function *ef\_ldv\_scaled*. This function is used to multiply emission factors from *ef\_ldv\_speed* with a constant.

10 The new emission factor (dependent on speed) has the same value as the local emission factor, which is evaluated at the reference speed of the measurement  $34.12 \text{ km} \cdot \text{h}^{-1}$  for FTP-75. The default speed value is  $34.12 \text{ km} \cdot \text{h}^{-1}$ , but this value must change correspondingly to the speed of the driving conditions. To use this function, it is necessary to scale emission standards of local emission factors with Euro Standards. In the following code, *Euro\_LDV* is a vector indicating Euro Standard by age of use.

```

15 lef <- ef_ldv_scaled(col, cod, v = "PC", cc = "<=1400", f = "G", p = "CO",
  eu = col$Euro_LDV)

```

### 4.3 Emission estimation

After inputting the database of vehicles and their respective emission factors, VEIN is ready to use the *emis* function. The VEIN package counts with several *emis* functions according to the type of emission being estimated. The *emis* function assembles data and outputs from other VEIN functions, and estimates the emissions for the number of hours and days in the week. This function reads the morning rush hour traffic data by age of vehicle use and extrapolates it with the profile data-frame, as previously explained. It reads the emission factors stored in a list with length matching the age distribution of the vehicle category and then reads the list of speeds. This function returns the emissions at each street in an array with 4 dimensions: 1) number of streets; 2) max age of age distribution; 3) hours (usually 24); and 4) days (usually 7). For convenience, there are defined default values for this function *hour* = 24, *day* = 7 and *array* = TRUE. The values can be changed accordingly.

For example, the estimation of the traffic simulations shown in Fig. 2 has 34,733 streets, fleet of 41 years age distribution, 24 hours of the day, and 7 days of the week. Therefore, it will produce an emissions array with dimensions 34,733, 41, 24 and 7. The vehicle fleet used to produce the age distribution is shown in green in Fig. 5(a) and it has 41 years of length.

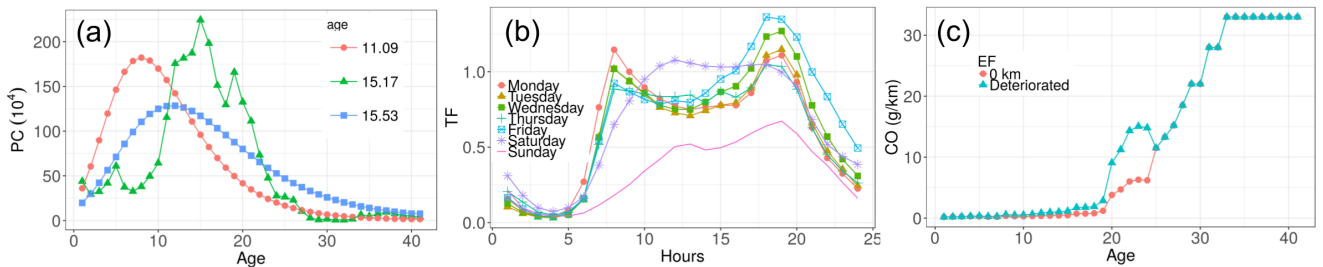

**Figure 5.** (a) Distribution of LDV composition by age of use, (b) temporal factor for expanding morning rush hour traffic data and (c) CO emission factors used in the estimation presented in this manuscript.

```
data(pc_profile)
E_CO <- emis(veh = pc1, lkm = net$lkm, ef = lef, speed = speed, profile = pc_profile)
```

This emissions array output for 34,733 streets and vehicle fleet with 41 years age distribution, 24 hours and 7 days of the week, has the size of 1.8 Gb. Hence, it is recommended to use the function *emis\_post* and then delete the original emissions array. The arguments include: the emissions array, type of vehicle, size or weight, fuel, pollutant, and the boolean argument *by*. The *emis\_post* function was created to preserve the most important information in the emissions array, to use less memory size and to be compatible with the packages **sp** (Pebesma and Bivand, 2005) and **ggplot2** (Wickham, 2009). VEIN outputs could also be used with the package **openair** (Carslaw and Ropkins, 2012). *emis\_post* returns a data-frame, but the argument *by* determines the shape of the data-frame. When *by* has the value 'veh', it returns a data-frame with an aggregation of the emissions array by each vehicle's age of use with columns: vehicle name, emission (in grams), vehicle type, size, fuel, pollutant, age, hour and day. This output allows the user to visualize hourly emissions at each day of the week, as shown in Fig. 6. Higher emissions are found at morning and evening rush hours from Monday to Friday. Saturday has peak higher emissions at noon and Sunday has the lowest emissions.

VEIN enables the user to identify which type of vehicle emits more by age of use. This is particularly useful for environmental authorities who aim to reduce local traffic emissions and restrict the circulation of high-emitting vehicles. Fig. 6 shows the CO emissions of gasoline fueled LDV by the vehicle's age of use. The average age of these vehicles is 15.17 years, as shown by the green curve in Fig. 5 (a). The total number of vehicles is  $24708767 \text{ veh} \cdot \text{h}^{-1}$  (8:00-9:00 LT on a Monday). The total CO emissions is  $233095 \text{ t} \cdot \text{y}^{-1}$ , considering a year of 52 weeks, but the emissions are concentrated for the LDV between 20 and 23 years of use. The vehicles in this age interval represent 14.76% of the fleet, emitting 63.79% ( $148712 \text{ t} \cdot \text{y}^{-1}$ ) of the total emissions. In other words, 15% of the fleet emit more than 60% of the CO. Between 1992 and 1996, the emissions standard was Proconve L2, equivalence with Euro 1 (see Table 2), and also the introduction of the catalytic system in Brazil. Therefore, the high emissions are due to vehicles with a deteriorated catalytic converter. This information is useful for reducing air pollution, thus supporting the aims of environmental planners and local authorities.

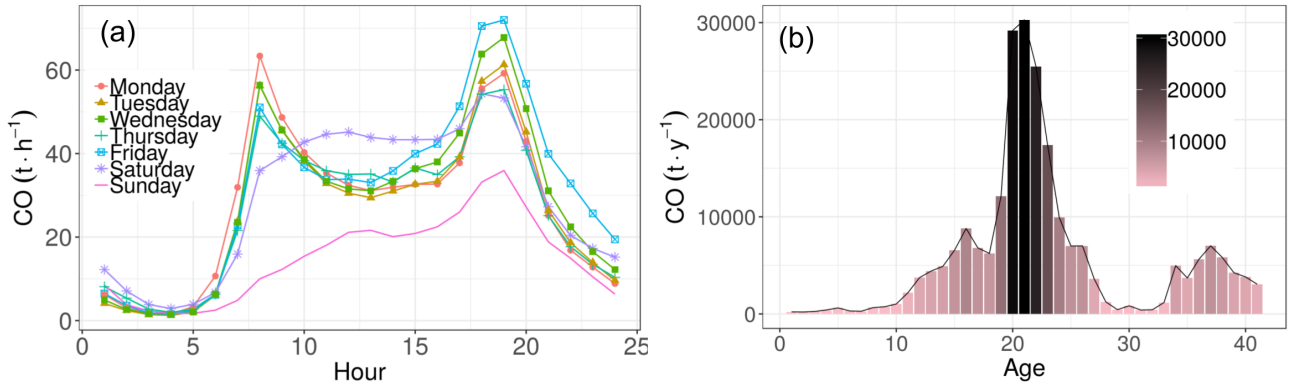

**Figure 6.** (a) CO Emissions ( $\text{g} \cdot \text{h}^{-1}$ ) per hour of the day and day of the week (colored and shaped lines) for LDV from MASP, (b) CO Emissions ( $\text{t} \cdot \text{y}^{-1}$ ) according to the age of use of the LDV from MASP.

#### 4.4 Post estimation

- 10 The spatial dimensions of the emissions estimation is an important feature of VEIN because it allows the representation of the streets into spatial vectors. This is accomplished by using the function `emis_post` with the argument `by` equal to `'streets_narrow'` or `'streets_wide'`. Both options return a data-frame with different characteristics, which can be converted into spatial vectors. When `by` is equal to `'streets_narrow'`, it returns a data-frame with four columns: `id`, indicating the number of rows, `emissions`, `hour` and `day of the week`. The number of rows in the data-frame is the original number of selected streets multiplied by the hours and days of the week. For example, when there are 34733 streets, 24 hours and 7 days of the week, it returns a data-frame with 5835144 rows having a size of 133.6 Mb. This option is useful to visualize the temporal behavior of specific streets with **ggplot2** (Wickham, 2009) or **ggmap** (Kahle and Wickham, 2013), for instance.
- 5 In most cases, users will be particularly interested when the argument `by` is equal to `'streets_wide'`. This produces a data-frame with number of rows matching number of streets for the domain and number of columns as hours. Fig. 7 shows the CO emissions for LDV at each street on a Friday at 19:00 LT. The following code shows how to produce hourly emissions by street and then add these emissions back into the `SpatialLinesDataFrame` `net`. This is possible because the number of rows in `E_CO_STREETS` is equal and it matches the number of rows in `net`.
- 10 

```
E_CO_STREETS <- emis_post(arra = E_CO, pollutant = "CO", by = "streets_wide")
net@data <- cbind(net@data, E_CO_STREETS)
```

The emissions shown in Fig. 7 are concentrated in two streets, a motorway and a trunk street at the northern part of the emissions map. This image was generated with the function **splot** in the package **sp**.

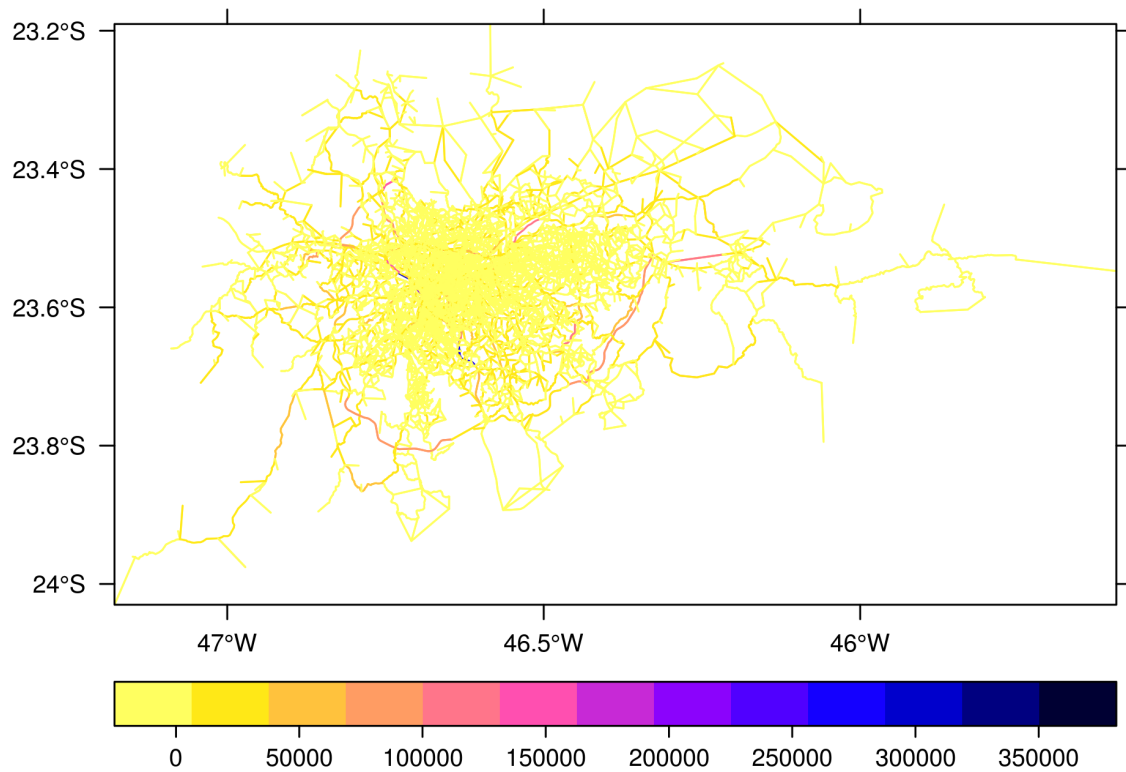

**Figure 7.** CO Emissions (colored lines;  $\text{g} \cdot \text{h}^{-1}$ ) for LDV at Friday 19:00 LT over MASP.

15 It also shows a rectangular grid, which can be used for allocating the emissions. The allocation of emissions into the grid is very important for visualization and for inputs to air quality models. We included a simple function to create a rectangular grid in VEIN. The function was named, *make\_grid*, which has the arguments, *width*, *height* and a boolean argument *polygon* for determining the type of output. When the argument *polygon* is TRUE, it returns a *SpatialPolygonsDataFrame*, and when it is FALSE, it returns a *SpatialGridDataFrame*. The units of 'width' and 'height' depend on the coordinate  
20 reference systems of the data.

The allocation of emissions in each grid cell is produced by a spatial interception between the emissions at each street and the polygon-grid. Firstly, the *SpatialLinesDataFrame* object with emission must contain a column with the length of the street. The length is calculated with the function *gLength* in the package **rgeos** (Bivand and Rundel, 2016). Secondly, it is performed at the intersection between the *SpatialLinesDataFrame* of emissions and the grid *SpatialPolygonsDataFrame*.  
25 The intersection is performed by importing the function *intersect* in the package **raster** (Hijmans, 2016). The grid must have a column with the id for each cell. Thirdly, it calculates, in another column, the length of the street in the resulting *SpatialPolygonsDataFrame*. Then it multiplies the emissions with the proportion of the new and old length of the street. This allows proportional emissions in each grid cell. Fourthly, it aggregates the emissions by id of grid and adds these

emissions by grid id into the grid. The results are in emissions grid with format `SpatialPolygonsDataFrame`. These  
30 calculations can be performed automatically by the function `emis_grid`.

The function `make_grid` is suitable in mid-size or small cities when the resolution is approximately 1 km. When dealing with  
larger cities and higher resolution, it is recommended to use other tools because `make_grid` would take up too much time. This  
difficulty will be overcome in a future version of VEIN with dependencies on package `sf` (Pebesma, 2016). In the following  
code, we show the use of the function `make_grid` only for example purposes. It is recommended that function `emis_post` be  
used with the argument `'by = streets_wide'`, in order to return a data-frame with hourly emissions for each street. This output  
can be used with the functions `emis_grid` to create an emissions grid map, as shown in Fig. 8. This is helpful when the user  
plans to use the data to construct inputs for air quality models. The following code applies with the demo inside the VEIN  
5 model.

```
g <- make_grid(spobj = net, width = 0.00976, height = 0.00976, polygon = T)
E_CO_g <- emis_grid(spobj = net, g = g, sr = "+init=epsg:31983", type = "lines")
```

The Fig. 8 (a) shows the resulting emissions of CO in a grid with class `SpatialPolygonsDataFrame` built for a grid  
with resolution of 1 km representing the base year 2015. This emissions grid was built using the package `sf` (process showed  
10 in the Appendix A). Fig. 8 (b) shows the CO emissions grid of road transport from EDGAR for the same area and base year  
2010 (EJ-JRC/PBL, 2016), which is the latest available year.

## 4.5 Speciation

Atmospheric simulations of ozone require knowledge about the VOC compounds and particulate matter speciation, which are  
necessary for solving the different chemical mechanisms. For example, a São Paulo study of ozone concentrations that used  
15 models BRAMS/SPM (Freitas et al., 2005) and WRF/Chem (Grell et al., 2005), involved detailed VOC speciation (Andrade  
et al., 2015). It is important to mention that there is evidence to prove that reducing Black Carbon emissions would help lower  
the Global Radiative Forcing and improve population health (Bond et al., 2013). Hence, the speciation of emissions is important  
and VEIN provides this information. The VEIN function `speciate` splits VOC and PM into their constituents. The arguments  
of these functions are: emissions estimation, type of speciation, type of vehicle, fuel and Euro Standard. There are four types  
20 of PM speciation: `'bcom'` (15) because it splits PM in black carbon and organic matter (Ntziachristos and Samaras, 2016),  
`'tyre'`, `'break'`, and `'road'` (Ntziachristos and Boulter, 2009). However, there is currently only one type of VOC speciation for  
MASP, the `'iag'` (Rafee, 2015). (15) The name of the speciation `'iag'` comes from the initials of the Institute of Astronomy,  
Geophysics and Atmospheric Sciences of the University of São Paulo. The speciation `'iag'` it is based on measurements made  
by this institute.

## 25 4.6 Input of atmospheric models

Meteorological factors influence the chemical process of pollutants in the atmosphere. Therefore, their transport and behavior  
in the atmosphere must be predicted by a model that includes the meteorological components ((16) "in-line" coupling of

meteorology and chemistry), such as the Weather Research and Forecasting Chemistry model (WRF-Chem; Grell et al. 2005). This model has been widely used around the world since its inception (2005 to 2006).

30 WRF-Chem, as another regional atmospheric model, requires a superficial layer of emission fluxes as input data. There are tools to assimilate top-down emissions inventories, such as EDGAR (Olivier et al., 1996) and REanalysis of the TROpospheric chemical composition (RETRO; Schultz 2007), using the software PREP-Chem (Freitas et al., 2011). These tools are very important to the modeling community, however, their spatial resolutions are very limited. VEIN includes functions to generate WRF-Chem inputs from the emissions grid with any desired resolution in the following way. VEIN estimates emissions of different pollutants at each street and also produces emissions grids needed to do the regional modeling. This is performed through the spatial intersection between emissions at streets and a polygon grid with the required resolution. The resulting grid has total emissions in each grid cell proportional to the length of the streets inside each cell.

Fig. 8 shows a comparison for VEIN (Fig. 8a) and EDGAR (Fig. 8b), using emissions inventory for the CO in MASP. One  
5 can notice that CO is spatially well represented for VEIN, by comparison with EDGAR. Furthermore, VEIN offers much more details about the emission of this pollutant, which occurs mainly in the urban motorways due to the high volume of traffic in these roads. The total emissions of CO emissions using VEIN are  $1.73\text{e-}06 \text{ (kg} \cdot \text{m}^{-2} \cdot \text{s}^{-1}\text{)}$ , considering the first second of a typical Monday at 00:00 LT and EDGAR,  $8.46\text{e-}08 \text{ (kg} \cdot \text{m}^{-2} \cdot \text{s}^{-1}\text{)}$ . Therefore, VEIN estimates are 20.50 times higher than EDGAR. This difference could be higher if compared with the morning rush hour of VEIN. However, it is important to mention  
10 that the estimate with VEIN for this manuscript is illustrative, and that more detailed emissions inventories should be made when comparing to others. For example, the inventory for this manuscript includes estimates only for LDV assuming that all are PC. It does not include other types of vehicles as the total amount of vehicles were not calibrated with fuel consumption. Ntziachristos and Samaras (2016) recommends to compare bottom-up estimates with fuel consumption in order to calibrate inputs of emissions inventory (traffic data in this case). These differences highlight the needs for development, inter-comparison  
15 and uncertainty evaluation of emission estimates. These results are very useful for many scientific and standardization purposes such as health effects in air pollution studies, urban planning and strategies to cut greenhouse gas emissions.

The VEIN model provides functions to transform the emissions grids into inputs for the model Assimilating Anthropogenic Emissions (AAS4WRF) (Vara-Vela et al., 2016). AAS4WRF consists of an NCL (Boulder, 2017) script that reads the wrfinput file and an emissions text file produced by VEIN to create a WRF-Chem input file. The VEIN model provides the function *emis\_wrf* to automatically create a data-frame in the correct format with columns longitude, latitude, id of grid cell, pollutants, local time and GMT time in format POSIXct. The arguments of *emis\_wrf* are *sdf*, which is a list of SpatialPolygonsDataFrames, each per pollutant. *nr* indicates how many times the hours of estimations will be re-  
5 peated. *dmyhm* indicates the day, month, year, hour and minute of the first hour of emissions in local time. *tz* is the time-zone and *utc* indicates the difference in hours between local and GMT time. *islist* indicates if the first argument, *df* is a list (islist = TRUE) or a data-frame (islist = FALSE). The output of VEIN emissions are in  $\text{g} \cdot \text{h}^{-1}$ , and in the following code chunk, emissions were converted to mol.

```
E_CO_g@data <- E_CO_g@data[, -1] / (12 + 16)
10 ldf <- list("co" = E_CO_g)
```

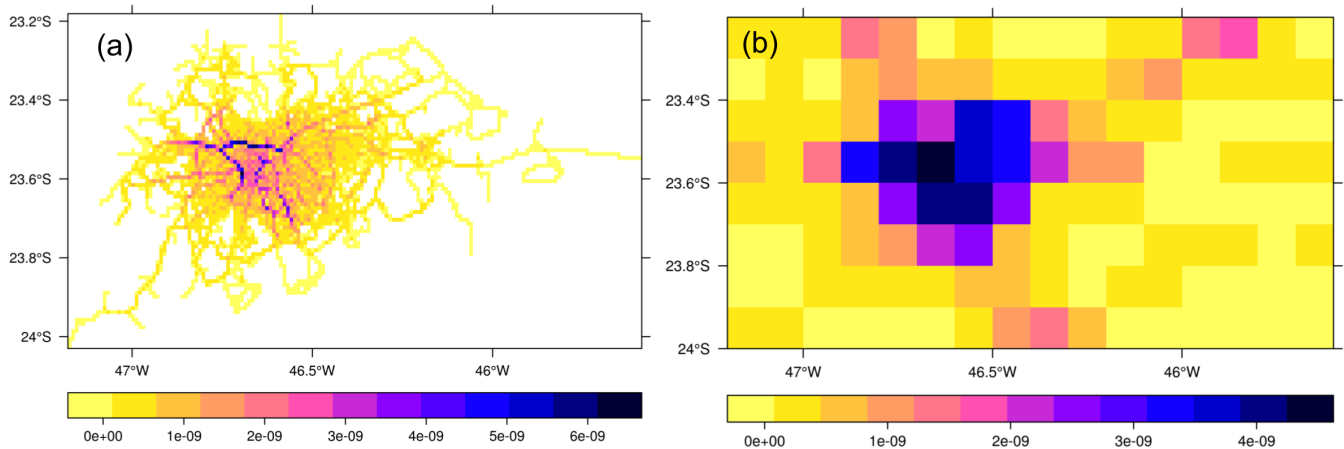

**Figure 8.** CO emissions ( $\text{kg} \cdot \text{m}^{-2} \cdot \text{s}^{-1}$ ) in MASP for (a) Monday at 00:00:00 LT, estimated with VEIN, and (b) the emissions of road transport for the same area from EDGAR.

```
df_wrf <- emis_wrf(ldf, nr = 1, dmyhm = "04-08-2014 00:00",
tz = "America/Sao_Paulo", utc = -3, islist = TRUE)
```

(17) The authors are currently developing another model called *eixport* (Ibarra-Espinosa and Schuch, 2017) for producing emission inputs to other models and it is currently implemented the generation of WRF-Chem input files inside R (see <https://github.com/ibarraespinosa/eixport>). Other models considered are BRAMS-SPM (Freitas et al., 2005), R-LINE (Snyder et al., 2013) and more.

## 5 Discussion and Conclusions

In this manuscript we introduce the development of the Vehicular Emission INventory (VEIN model v0.2.2), an open source model, to produce high resolution spatial and hourly emission estimation. VEIN is a tool suited for application in complex environmental science studies, including regional atmospheric modeling. It generates inputs for air quality models in order to forecast air pollutant concentrations or for studies of greenhouse gas emissions from vehicular sources. It can be used to study the relationship between emissions and health effects. A recent study used VEIN estimates with a grid of 10 m resolution to determine the relationship between vehicular emissions and birth outcomes in the western area of São Paulo (Fink et al., 2017). VEIN can be used as a tool for urban planning in order to estimate vehicular emissions due to interventions at road networks in most cities. It was written in an R package that includes several methods for estimating vehicular emissions in a harmonized way.

VEIN provides functions to easily produce inputs of regional air quality models such as WRF-Chem (Grell et al., 2005) and BRAMS/SPM (Freitas et al., 2005). In Fig. 8, the comparison between VEIN and EDGAR (EJ-JRC/PBL, 2016) of CO emissions shows that emissions are heavily concentrated in few streets with a high volume of traffic. EDGAR emissions do

30 not provide this level of detail and they are lower than VEIN estimates. Furthermore, the highest spatial resolution of EDGAR is 0.1 degree, approximately 12 km and it is possible to have better resolution with VEIN. Based on these factors, it can be concluded that EDGAR is suitable for modeling air pollution in larger domains without considering meteorological meso-scale interactions, including feedbacks. However, with the progressing computational advances, it would be possible to perform air pollution modeling for larger domains with higher resolution and level of detail. VEIN can produce these necessary inputs with a bottom-up approach.

VEIN currently experiences some limitations. The first limitation is the availability of activity data. VEIN needs at least one hour of traffic data for each street considered in the estimation. This data can be based on traffic simulation or traffic counts, however, most of cities do not count with this type of data in developing countries. In this case, new data should be generated with traffic counts and interpolations. In addition, the widespread use of applications for smart-phones such as Waze (R) or Uber (R), among others, produce traffic data that eventually could be used as activity data for estimating vehicular emissions. For example, currently Google Traffic (<https://developers.google.com/maps/coverage>) cover several countries and this data could provide valuable information to estimate vehicular emissions in cities with non-traffic simulation or traffic counts. It is expected that new features will be added in future versions of VEIN. One very promising feature will be the migration of the spatial dependencies into the new spatial features **sf** package. This package provides S3 classes for handling spatial data faster than its predecessor, the package **sp** (Pebesma and Bivand, 2005).

The emission factors are another aspect of VEIN that can be enhanced in future versions. They could be sourced from several emissions studies, such as tunnel studies (Pérez-Martínez et al.; Martins et al.), or others based on traffic situations whereby emissions are sourced from driving cycles (ARTEMIS for example, André) or other experimental campaigns (Corvalán and Vargas, 2003). The International Vehicular Emissions (IVE) is a top-down vehicular emission model that has been used in different countries to estimate vehicular emissions (González et al., 2017; Wang et al., 2008). It could be possible to derive emission factors from IVE and estimate their corresponding emissions in VEIN, in order to use the capabilities of VEIN.

VEIN's purpose is to serve as a tool for air quality research and environmental management. Since air quality models need detailed emissions species, VEIN was created with the function *speciate*. VEIN will add several new speciations into these functions, such as those in the EMEP/EEA guidelines (Ntziachristos and Samaras, 2016). In the case of Brazil, there are several studies of tropospheric ozone, which use speciation of VOC emissions as an input (Vara-Vela et al., 2016; Abou Rafee et al., 2017).

*Code and data availability.* VEIN is available at the Comprehensive R Archive Network (CRAN) <https://CRAN.R-project.org/package=vein> and github <https://github.com/ibarraespinosa/vein/releases> DOI:10.5281/zenodo.1039236, updates available at <https://github.com/ibarraespinosa/vein/>. The software version "Vehicular Emissions INventories (VEIN) v0.2.2" was developed using the R programming language v3.4.1. For further information about the VEIN package, contact developer Sergio Ibarra Espinosa at [sergio.ibarra@usp.br](mailto:sergio.ibarra@usp.br). Datasets included: Emission factors *fe2015* and mileage functions *fkm* from the Environmental Agency of São Paulo (CETESB). In addition, emission and deterioration factors are provided in the form of look-up tables from Copert (Ntziachristos and Samaras, 2016). These include hot emissions factors for



30 light duty vehicles (LDV), heavy duty vehicles (HDV), cold start, evaporative factors, cold starts, resuspension and performs speciations. Emission factor functions are included for USEPA/AP42 (EPA, 2002) estimations with default parameters. There are also two datasets to perform the example functions, a data-frame to extrapolate morning peak hour vehicle traffic data to each hour of the week *pc\_profile*, and a vehicle start pattern *pc\_cold* to be used for cold start estimation. Moreover, VEIN includes a traffic simulation for the western region of São Paulo City named, *net*. Software required: VEIN depends on the package "sp" and uses some functions from "rgeos", "rgdal", "raster" and "units" packages. The user must install libraries **geos, v3.5.1, gdal, v2.1.2** and **udunits, v2.2.20**.

## Appendix A: Intercept grid and street emissions

```
library(vein)
library(sf)

5 # Converting objects into "sf" and projecting to UTM zone 23S - EPSG:31983
g_sf <- st_as_sf(spTransform(g, CRSobj = "+init=epsg:31983"))
net_sf <- st_as_sf(spTransform(net, CRSobj = "+init=epsg:31983"))
# Calculating initial length of net_sf
net_sf$LKM <- st_length(st_cast(net_sf[st_dimension(net_sf) == 1,]))

10 # Intersecting net and grid
net_sf_g <- st_intersection(net_sf, g_sf)
# Calculating new length of net_sf
net_sf_g$LKM2 <- st_length(st_cast(net_sf_g[st_dimension(net_sf_g) ==1,]))
# Checking dimensions

15 dim(net_sf_g)
# Converting from sf to data.frame
net_sf_gg <- as.data.frame(net_sf_g)
# Eliminating column 'geometry'
net_sf_gg <- net_sf_gg[,-171]
# Obtaining proportional emissions of 168 hours of the week
net_sf_gg[,1:168] <- net_sf_gg[,1:168] *

5 as.numeric(net_sf_gg$LKM2/net_sf_gg$LKM)
# Agregating emissions by id of grid
dfm <- aggregate(cbind(net_sf_gg[, 1:168]),
                  by = list(net_sf_gg$id), sum, na.rm = TRUE)
# naming columns of data-frame dfm

10 names(dfm) <- c("id", paste0("h", 1:168))
# Creating data-frame for id of grid
gx <- data.frame(id = g$id)
```

```

# merging data-frames
gx <- merge(gx, dfm, by="id", all.x = T)
15 # Generating spatial grid and converting to "Spatial"
E_CO_g <- as(st_sf(gx, geometry = g_sf$geometry), "Spatial")
# Converting to WGS84 lat lon
E_CO_g <- spTransform(E_CO_g, "+init=epsg:4326")

```

20 *Author contributions.* SIE designed and implemented the entire model. All authors contributed to the final manuscript.

*Competing interests.* The authors declare they have no actual or potential competing interest.

*Acknowledgements.* We thank the Environmental Agency of São Paulo State (CETESB), the programs CAPES and CNPQ (Ministry of Education, Brazil) and CONICYT (Ministry of Education, Chile). Also, this work was partially supported by the FONDAP/ CONICYT 15110009 project. These entities provided data and support that was invaluable to this study. We also thank Angel Vara-Vela from Department  
25 of Atmospheric Sciences at University of São Paulo, for discussions and tests relating to the integration between AAS4WRF and VEIN.

## References

- Abou Rafee, S. A., Martins, L. D., Kawashima, A. B., Almeida, D. S., Morais, M. V., Souza, R. V., Oliveira, M. B., Souza, R. A., Medeiros, A. S., Urbina, V., et al.: Contributions of mobile, stationary and biogenic sources to air pollution in the Amazon rainforest: a numerical study with the WRF-Chem model, *Atmospheric Chemistry and Physics*, 17, 7977–7995, 2017.
- 30 Andrade, M. d. F., Ynoue, R. Y., Freitas, E. D., Todesco, E., Vara Vela, A., Ibarra, S., Martins, L. D., Martins, J. A., and Carvalho, V. S. B.: Air quality forecasting system for Southeastern Brazil, *Frontiers in Environmental Science*, 3, 1–12, doi:10.3389/fenvs.2015.00009, 2015.
- Andrade, M. d. F., Kumar, P., de Freitas, E. D., Ynoue, R. Y., Martins, J., Martins, L. D., Nogueira, T., Perez-Martinez, P., de Miranda, R. M., Albuquerque, T., et al.: Air quality in the megacity of São Paulo: Evolution over the last 30 years and future perspectives, *Atmospheric Environment*, 159, 66–82, doi:https://doi.org/10.1016/j.atmosenv.2017.03.051, 2017.
- 35 André, M.: The ARTEMIS European driving cycles for measuring car pollutant emissions. ARTESP: Toll station count data, <http://www.artesp.com.br>, 2012.
- Barlow, T., Latham, S., McCrae, I., and Boulter, P.: A reference book of driving cycles for use in the measurement of road vehicle emissions, TRL Published Project Report, 2009.
- Bivand, R. and Lewin-Koh, N.: maptools: Tools for Reading and Handling Spatial Objects, <http://CRAN.R-project.org/package=maptools>, r package version 0.8-34, 2015.
- Bivand, R. and Rundel, C.: rgeos: Interface to Geometry Engine - Open Source (GEOS), <https://CRAN.R-project.org/package=rgeos>, r package version 0.3-21, 2016.
- 5 Bivand, R., Pebesma, E., and Gomez-Rubio, V.: Applied spatial data analysis with R, Springer, NY, <http://www.asdar-book.org/>, 2013.
- Bivand, R., Keitt, T., and Rowlingson, B.: rgdal: Bindings for the Geospatial Data Abstraction Library, <https://CRAN.R-project.org/package=rgdal>, r package version 1.1-10, 2016.
- Bond, T. C., Doherty, S. J., Fahey, D. W., Forster, P. M., Berntsen, T., DeAngelo, B. J., Flanner, M. G., Ghan, S., Kärcher, B., Koch, D., Kinne, S., Kondo, Y., Quinn, P. K., Sarofim, M. C., Schultz, M. G., Schulz, M., Venkataraman, C., Zhang, H., Zhang, S., Bellouin, N., Guttikunda, S. K., Hopke, P. K., Jacobson, M. Z., Kaiser, J. W., Klimont, Z., Lohmann, U., Schwarz, J. P., Shindell, D., Storelvmo, T., Warren, S. G., and Zender, C. S.: Bounding the role of black carbon in the climate system: A scientific assessment, *Journal of Geophysical Research: Atmospheres*, 118, 5380–5552, doi:10.1002/jgrd.50171, <http://dx.doi.org/10.1002/jgrd.50171>, 2013.
- 10 Boulder, C. U.: The NCAR Command Language (NCL)(version 6.4. 0), <http://dx.doi.org/10.5065/D6WD3XH5>, accessed ?? ?? ??, 2017.
- 15 Boulter, P.: Environmental traffic management: A review of factors affecting cold start emissions, Tech. rep., Transport Research Laboratory, Old Wokingham Road, Crowthorne, Berkshire, RG45 6AU, UK, 1997.
- Bruni, A. D. C. and Bales, M. P.: Curvas de intensidade de uso por tipo de veículo automotor da frota da cidade de São Paulo, Tech. rep., CETESB, <http://veicular.cetesb.sp.gov.br/wp-content/uploads/sites/35/2013/12/curvas-intensidade-uso-veiculos-automotores-cidade-sao-paulo.pdf>, 2013.
- 20 Bureau of Public Roads: Traffic and assignment manual, Tech. rep., Dept. of Commerce, Urban Planning Division, Washington D.C., 1964.
- Carslaw, D. C. and Ropkins, K.: Openair—an R package for air quality data analysis, *Environmental Modelling & Software*, 27, 52–61, 2012.
- CET: Simulação de tráfego para Região Metropolitana de São Paulo, <http://www.cetsp.com.br>, 2014.
- CETESB: Emissões Veiculares no Estado de São Paulo, <http://veicular.cetesb.sp.gov.br/relatorios-e-publicacoes/>, 2013.
- 25 CETESB: Emissões Veiculares no Estado de São Paulo, 2016.

- Chen, R.-H., Chiang, L.-B., Chen, C.-N., and Lin, T.-H.: Cold-start emissions of an SI engine using ethanol–gasoline blended fuel, *Applied Thermal Engineering*, 31, 1463–1467, 2011.
- CONAMA: RESOLUÇÃO CONAMA Nº 18, de 6 de maio de 1986, <http://www.mma.gov.br/port/conama/res/res86/res1886.html>; accessed 21-January-2014, 1986.
- 30 Corvalán, R. M. and Vargas, D.: Experimental analysis of emission deterioration factors for light duty catalytic vehicles Case study: Santiago, Chile, *Transportation Research Part D: Transport and Environment*, 8, 315–322, 2003.
- Corvalán, R. M., Osses, M., and Urrutia, C. M.: Hot emission model for mobile sources: application to the metropolitan region of the city of Santiago, Chile, *Journal of the Air & Waste Management Association*, 52, 167–174, 2002.
- Davis, N., Lents, J., Osses, M., Nikkila, N., and Barth, M.: Part 3: Developing countries: development and application of an international vehicle emissions model, *Transportation Research Record: Journal of the Transportation Research Board*, 8, 155–165, 2005.
- 35 DENATRAN: National Department of Traffic Road, Available in: <http://www.denatran.gov.br/frota2015.htm>, online; accessed 04 February 2016, 2015.
- Directive 70/220/EEC: Measures to be taken against the emission of gaseous pollutants from diesel engines for use in vehicles, <http://eur-lex.europa.eu/legal-content/EN/TXT/PDF/?uri=CELEX:31991L0441&from=EN>, 1991.
- EEA, E.: Emission Inventory Report 1990–2011 Under the UNECE Convention on LRTAP, European Environment Agency, Luxembourg, 2013.
- EJ-JRC/PBL: Emission Database for Global Atmospheric Research (EDGAR), release EDGAR v4.3.1\_v2 (1970 - 2010), <http://edgar.jrc.ec.europa.eu>, 2016.
- 5 EPA, A.: Comprehensive analysis of biodiesel impacts on exhaust emissions, Tech. rep., Draft Technical Report, EPA420-02-001, 2002.
- Fink, G., O’Sullivan, S., Ibarra-Espinosa, S., Grisi, S., Saldiva, P., and Brentani, A.: Exposure to Outdoor Air Pollution and Birth Outcomes – Evidence from São Paulo’s Western Region Project, Submitted to *Environmental Health Perspectives*, 2017.
- Freitas, E., Martins, L., Silva Dias, P., and Andrade, M. d. F.: A simple photochemical module implemented in RAMS for tropospheric ozone concentration forecast in the metropolitan area of São Paulo, Brazil: Coupling and validation, *Atmospheric Environment*, pp. 6352–6361, 2005.
- 10 Freitas, S., Longo, K., Alonso, M., Pirre, M., Marecal, V., Grell, G., Stockler, R., Mello, R., and Sánchez Gácita, M.: PREP-CHEM-SRC-1.0: a preprocessor of trace gas and aerosol emission fields for regional and global atmospheric chemistry models, *Geoscientific Model Development*, 4, 419–433, 2011.
- 15 González, C., Gómez, C., Rojas, N., Acevedo, H., and Aristizábal, B.: Relative impact of on-road vehicular and point-source industrial emissions of air pollutants in a medium-sized Andean city, *Atmospheric Environment*, 152, 279–289, 2017.
- Grell, G. A., Peckham, S. E., Schmitz, R., McKeen, S. A., Frost, G., Skamarock, W. C., and Eder, B.: Fully coupled “online” chemistry within the WRF model, *Atmospheric Environment*, 39, 6957–6975, 2005.
- Hijmans, R. J.: raster: Geographic Data Analysis and Modeling, <https://CRAN.R-project.org/package=raster>, r package version 2.5-8, 2016.
- 20 Ibarra-Espinosa, S. and Schuch, D.: eixport: R package to export VEIN and other emissions to other models Edit Add topics, <https://github.com/ibarraespinosa/eixport>, r package version 0.2.7, 2017.
- Ibarra-Espinosa, S. and Ynoue, R.: REMI model: Bottom-up emissions inventories for cities with lack of data, *Journal of Earth Sciences and Geotechnical Engineering*, 1, 277–288, 2017.
- IBGE: Instituto Brasileiro de Geografia e Estatística – Población estimada 2014, Available in: <http://cod.ibge.gov.br/232IH>, online; accessed 12 December 2014, 2014.
- 25

- Kahle, D. and Wickham, H.: ggmap: Spatial Visualization with ggplot2, *The R Journal*, 5, 144–161, <http://journal.r-project.org/archive/2013-1/kahle-wickham.pdf>, 2013.
- Koupal, J., Cumberworth, M., Michaels, H., Beardsley, M., and Brzezinski, D.: Design and Implementation of MOVES: EPA’s New Generation Mobile Source Emission Model, *Ann Arbor*, 1001, 48 105, 2003.
- 30 Lam, W. H. and Xu, J.: Estimation of AADT from short period counts in Hong Kong—A comparison between neural network method and regression analysis, *Journal of Advanced Transportation*, 34, 249–268, 2000.
- Leiner, B. M., Cerf, V. G., Clark, D. D., Kahn, R. E., Kleinrock, L., Lynch, D. C., Postel, J., Roberts, L. G., and Wolff, S. S.: The past and future history of the Internet, *Communications of the ACM*, 40, 102–108, 1997.
- Lents, J., Davis, N., Nikkila, N., and Osses, M.: São Paulo Vehicle Activity Study, Tech. rep., International Sustainable System Research Center, 605 South Palm Street, Suite C, La Habra, CA 90631, USA, 2004.
- 35 Ludykar, D., Westerholm, R., and Almen, J.: Cold start emissions at+ 22,- 7 and- 20 C ambient temperatures from a three-way catalyst (TWC) car: regulated and unregulated exhaust components, *Science of the Total Environment*, 235, 65–69, 1999.
- Martins, L. D., Andrade, M. F., Freitas, E. D., Pretto, A., Gatti, L. V., Albuquerque, É. L., Tomaz, E., Guardani, M. L., Martins, M. H., and Junior, O. M.: Emission factors for gas-powered vehicles traveling through road tunnels in São Paulo, Brazil.
- Mellios, G. and Ntziachristos, L.: EMEP/EEA emission inventory guidebook; Gasoline evaporation from vehicles, Tech. rep., European Environment Agency, Copenhagen, 2016.
- 5 Ministério do Meio Ambiente: Primeiro Inventário Nacional de Emissões Atmosféricas por Veículos Automotores Rodoviários, Availablein: [http://www.mma.gov.br/estruturas/163/\\_publicacao/163\\_publicacao27072011055200.pdf](http://www.mma.gov.br/estruturas/163/_publicacao/163_publicacao27072011055200.pdf), accessed ?? ?? ??, 2011.
- MMA: Air Pollution Control Program by Motor Vehicles; PROCONVE/PROMOT, <http://www.ibama.gov.br/phocadownload/category/4?download=4793%3Amanual-ingles>, accessed: 2015-09-08, 2011.
- 10 MMA: PROCONVE: PROGRAMA DE CONTROLE DE POLUIÇÃO DO AR POR VEÍCULOS AUTOMOTORES, [http://www.mma.gov.br/estruturas/163/\\_arquivos/proconve\\_163.pdf](http://www.mma.gov.br/estruturas/163/_arquivos/proconve_163.pdf), accessed: 2015-09-08, 2015.
- Nogueira, T., de Souza, K. F., Fornaro, A., de Fatima Andrade, M., and de Carvalho, L. R. F.: On-road emissions of carbonyls from vehicles powered by biofuel blends in traffic tunnels in the Metropolitan Area of Sao Paulo, Brazil, *Atmospheric Environment*, 108, 88–97, 2015.
- Ntziachristos, L. and Boulter, P.: EMEP/EEA emission inventory guidebook; Road Transport: Automobile tyre and break wear and road abrasion, European Environment Agency, Copenhagen, 2009.
- 15 Ntziachristos, L. and Samaras, Z.: EMEP/EEA emission inventory guidebook; Road Transport: Passenger cars, Light commercial trucks, Heavy-duty vehicles including buses and Motorcycles, European Environment Agency, Copenhagen, 2016.
- Olivier, J. G. J., Bouwman, A., Berdowski, J., Veldt, C., Bloos, J., Visschedijk, A., Zandveld, P., Haverlag, J., et al.: Description of EDGAR Version 2.0: A set of global emission inventories of greenhouse gases and ozone-depleting substances for all anthropogenic and most natural sources on a per country basis and on 1 degree x 1 degree grid, 1996.
- 20 Paustian, K., Ravindranath, N., and van Amstel, A.: 2006 IPCC Guidelines for National Greenhouse Gas Inventories, Tech. rep., 2006.
- Pebesma, E.: sf: Simple Features for R, <https://github.com/edzer/sf/r>, r package version 0.4-3, 2016.
- Pebesma, E. and Bivand, R.: Classes and methods for spatial data in R, <http://cran.r-project.org/doc/Rnews/>, 2005.
- Pebesma, E., Mailund, T., and Hiebert, J.: Measurement Units in R, *The R Journal*, 8, 486–494, <https://journal.r-project.org/archive/2016-2/pebesma-mailund-hiebert.pdf>, 2016.
- 25

- Pérez-Martínez, P., Miranda, R., Nogueira, T., Guardani, M., Fornaro, A., Ynoue, R., and Andrade, M.: Emission factors of air pollutants from vehicles measured inside road tunnels in São Paulo: case study comparison.
- Perugu, H., Wei, H., and Yao, Z.: Developing high-resolution urban scale heavy-duty truck emission inventory using the data-driven truck activity model output, *Atmospheric Environment*, 155, 210–230, 2017.
- Pulles, T. and Heslinga, D.: The art of emission inventorying, TNO, Utrecht, 2010.
- R Core Team: R: A Language and Environment for Statistical Computing, R Foundation for Statistical Computing, Vienna, Austria, <http://www.R-project.org/>, 2017.
- Rafee, S.: Estudo numerico do impacto das emissões veiculares e fixas da cidade de Manaus nas concentrações de poluentes atmosféricos da região amazônica, Master's thesis, Londrina: Universidade Tecnológica Federal do Paraná, 2015.
- Schultz, M. G.: REanalysis of the TROpospheric chemical composition over the past 40 years, 2007.
- Seinfeld, J. H. and Pandis, S. N.: *Atmospheric chemistry and physics: from air pollution to climate change*, 2016.
- Smit, R., Ntziachristos, L., and Boulter, P.: Validation of road vehicle and traffic emission models—A review and meta-analysis, *Atmospheric environment*, 44, 2943–2953, 2010.
- Snyder, M. G., Venkatram, A., Heist, D. K., Perry, S. G., Petersen, W. B., and Isakov, V.: RLINE: A line source dispersion model for near-surface releases, *Atmospheric environment*, 77, 748–756, 2013.
- Streets, D. G., Bond, T., Carmichael, G., Fernandes, S., Fu, Q., He, D., Klimont, Z., Nelson, S., Tsai, N., Wang, M. Q., et al.: An inventory of gaseous and primary aerosol emissions in Asia in the year 2000, *Journal of Geophysical Research: Atmospheres*, 108, 2003.
- US-EPA, title = National Emissions Inventory (NEI), <https://www.epa.gov/air-emissions-inventories/national-emissions-inventory-nei>.
- USA-EPA: AP42 Compilation of emission factors; Resuspension emissions from paved roads, Environment Protection Agency, USA, 2016.
- Vara-Vela, A., Andrade, M. F., Kumar, P., Ynoue, R. Y., and Muñoz, A. G.: Impact of vehicular emissions on the formation of fine particles in the São Paulo Metropolitan Area: a numerical study with the WRF-Chem model, *Atmos. Chem. and Phys.*, 16, 777–797, doi:10.5194/acp-16-777-2016, 2016.
- Wang, H., Chen, C., Huang, C., and Fu, L.: On-road vehicle emission inventory and its uncertainty analysis for Shanghai, China, *Science of the Total Environment*, 398, 60–67, 2008.
- Wang, X. and Kockelman, K.: Forecasting network data: Spatial interpolation of traffic counts from Texas data, *Transportation Research Record: Journal of the Transportation Research Board*, 1, 100–108, 2009.
- Weilenmann, M., Favez, J.-Y., and Alvarez, R.: Cold-start emissions of modern passenger cars at different low ambient temperatures and their evolution over vehicle legislation categories, *Atmospheric Environment*, 43, 2419 – 2429, doi:<http://dx.doi.org/10.1016/j.atmosenv.2009.02.005>, 2009.
- Wickham, H.: *ggplot2: elegant graphics for data analysis*, Springer New York, <http://had.co.nz/ggplot2/book>, 2009.
